# Supplementary material for: PlasmidHostFinder: Prediction of Plasmid Hosts Using Random Forest
Source: PubMed Central journal article supplement (PMC9040769; doi:10.1128/msystems.01180-21), 2022-04-06

Tree scale: 100000

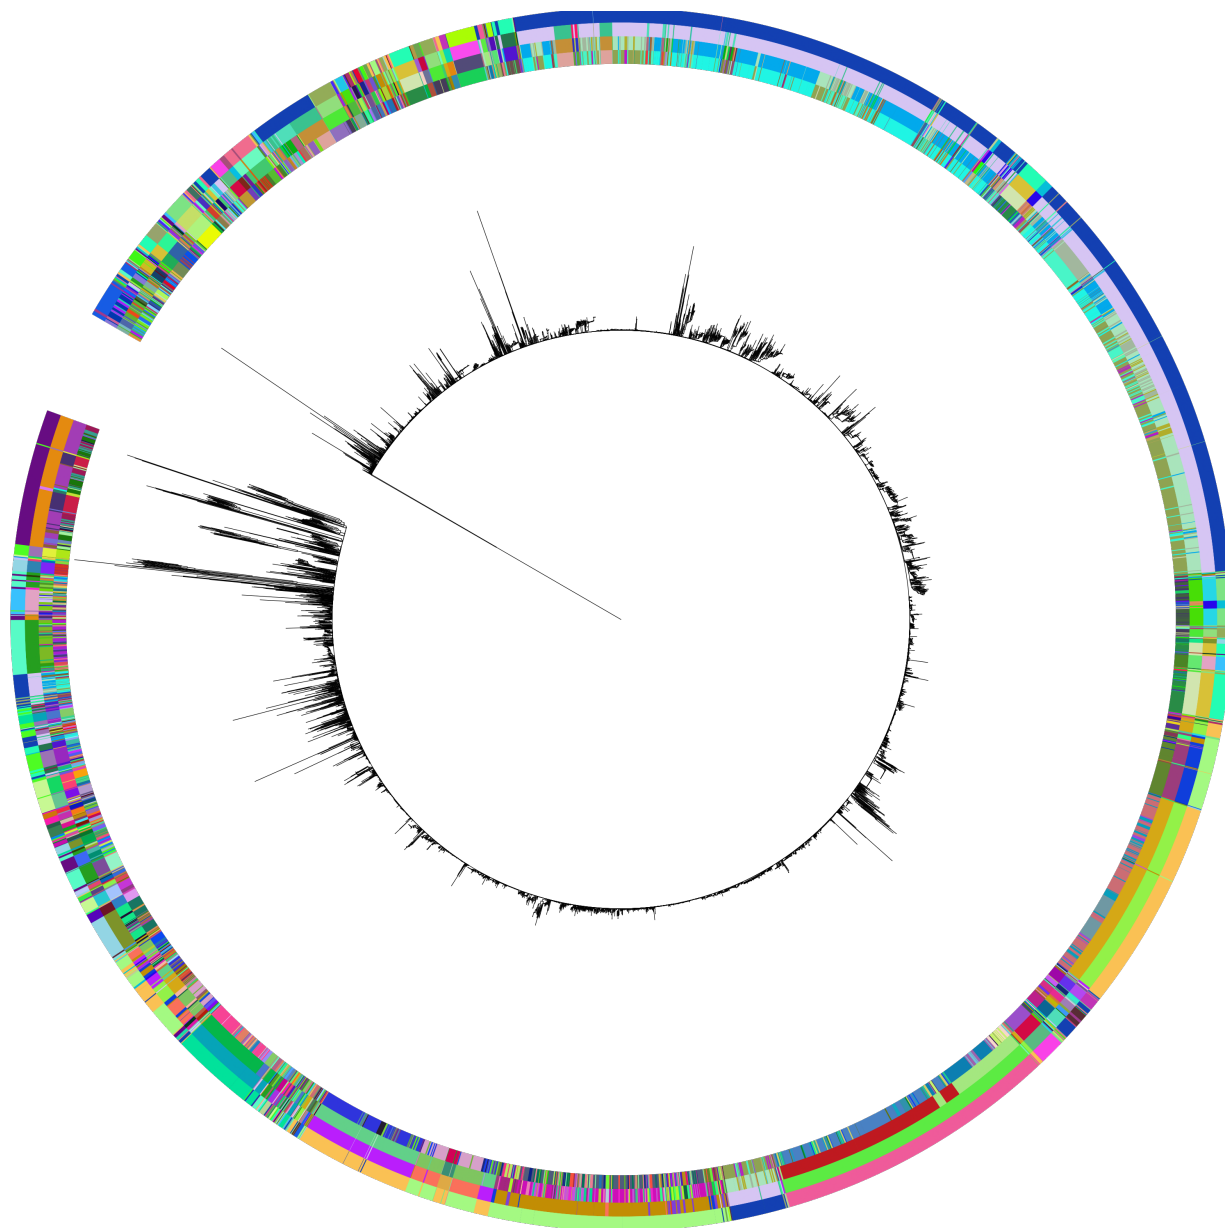

Supplement: msystems.01180-21-sf001.pdf [file msystems.01180-21-sf001.pdf]
